# Supplementary material for: Enhancing c-Si Solar Cell Efficiency in the UV Region: Photophysical Insights into the Use of Eu3+ Complexes for Down-Shifting Layer Applications
Source: MDPI journal article supplement (doi:10.3390/molecules28237924), 2023-12-04
Supplement: s1 [file s1]

# Electronic Supplementary Information

Enhancing c-Si Solar Cell Efficiency in the UV Region: Photophysical Insights into the Use of Eu<sup>3+</sup> Complexes for Down-Shifting Layer Applications

Fabian Vargas 1, Ronald Nelson 1, Dario Espinoza 1, Ivan Brito 2, Laura Sánchez-Muñoz 3, Pere Alemany 3, Sergio Ortiz 4, Pablo Ferrada 5, Alifhers Mestra 1,6 and Jaime Llanos 1,\*

1 Departamento de Química, Universidad Católica del Norte, Avda. Angamos 0610, Antofagasta 1270709, Chile; fabian.vargas@alumnos.ucn.cl (F.V.); rnelson@ucn.cl (R.N.); despinoza01@ucn.cl (D.E.); alifhers.mestra@ucn.cl (A.M.)

2 Departamento de Química, Universidad de Antofagasta, Antofagasta 1240000, Chile; ibrito@uantof.cl

3 Departamento de Ciència de Materials i Química Física, Institut de Química Teòrica i Computacional (IQTUB), Universitat de Barcelona, Diagonal 647, 08028 Barcelona, Spain; sanchezlaura124@gmail.com (L.S.-M.); p.alemany@ub.edu (P.A.)

4 UMR 7200 Laboratoire d'Innovation Thérapeutique, CNRS, Strasbourg Drug Discovery and Development Institute (IMS), Université de Strasbourg, 67400 Illkirch-Graffenstaden, France; ortizaguirre@unistra.fr

5 Centro de Desarrollo Energético Antofagasta, Universidad de Antofagasta, Angamos 601, Antofagasta 1240000, Chile; pablo.ferrada.m@uantof.cl

6 Centro Lithium I+D+i, Universidad Católica del Norte, Avenida Angamos 0610, Antofagasta 1270709, Chile

\* Correspondence: jllanos@ucn.cl; Tel.: +56-55-2355624

## Contents

|                                                                          |   |
|--------------------------------------------------------------------------|---|
| 1. Synthesis.....                                                        | 2 |
| 2. Optimization of C-P cross coupling. Synthesis of isoquinoline 4. .... | 6 |
| 3. Powder Diffraction Patterns.....                                      | 7 |
| 4. NMR, IR, Raman and MS Spectra .....                                   | 8 |

## 1. Synthesis

### 1.1 General Procedures

All solvents and reagents were purchased from Sigma Aldrich, Merck, or AK Scientific and were used without further purification. The reactions were monitored by thin-layer chromatography (TLC). TLC was performed on silica gel plates and components were visualized by observation under UV light, and/or by treating the plates with oleum solutions, followed by heating. Flash chromatography was carried out on silica gel (63-200  $\mu\text{m}$ ) unless otherwise stated. Melting points were determined using a Stuart SMP3 apparatus and were uncorrected. Infrared spectra were measured using a Perkin-Elmer FT-IR Spectrometer Spectrum Two with KBr pellets. NMR spectra were recorded in  $\text{CDCl}_3$  at 500 or 700 MHz (Bruker Advance III). Chemical shifts were reported in parts per million ( $\delta$ ) using the residual solvent signals as an internal standard for  $^1\text{H}$  and  $^{13}\text{C}$  NMR spectra and coupling constants ( $J$ ) in Hz. The Raman spectrum was recorded using the Raman Jasco RNS-4500 spectrometer. Mass spectra (ESI-MS) were acquired using an Agilent 1200 ESI/APCI QToF tandem Agilent Mass QToF 6520.

#### 1.1.1 Synthesis of methyl isoquinoline-1-carboxylate (**2**)

To a solution of isoquinoline-1-carboxylic acid (3.0 g, 17.3 mmol, 1.0 equiv.) in MeOH (173 mL),  $\text{H}_2\text{SO}_4$  (98%, 9.3 mL, 173.24 mmol, 10.0 equiv.) was added as a single portion. The solution was stirred for 24 h at 65  $^\circ\text{C}$ . After substrate consumption, the reaction mixture was cooled and neutralized with  $\text{NaHCO}_3$  (21 g). The precipitate was filtered out and the solvent was concentrated in vacuo. The residue was dissolved in  $\text{H}_2\text{O}$  and extracted with  $\text{CH}_2\text{Cl}_2$  (2 $\times$  50 mL). The combined organic layers were dried over  $\text{Na}_2\text{SO}_4$ , filtered and concentrated in vacuo to give the methyl isoquinoline-1-carboxylate (**2**) as a pale-yellow oil (2.25 g, 69%).  $R_f$  = 0.52 (50% EtOAc/hexane). IR ( $\text{cm}^{-1}$ )  $\nu$ : 3058, 2953, 1724, 1281, 1256, 1140 (Fig. S3).  $^1\text{H}$  NMR (700 MHz,  $\text{CDCl}_3$ )  $\delta$  8.79 (d,  $J$  = 8.7 Hz, 1H, H9), 8.59 (d,  $J$  = 5.6 Hz, 1H, H3), 7.83 (d,  $J$  = 8.3 Hz, 1H, H6), 7.78 (d,  $J$  = 5.7 Hz, 1H, H10), 7.69 (t,  $J$  = 7.0 Hz, 1H, H2), 7.65 (t,  $J$  = 7.3 Hz, 1H, H1), 4.06 (s, 3H, H14) (Fig. S2).  $^{13}\text{C}$

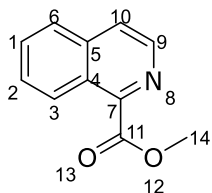

NMR (176 MHz,  $\text{CDCl}_3$ )  $\delta$  166.29 (CO, C11), 148.17 (C, C7), 141.57 (CH, C9), 136.98 (C, C5), 130.64 (CH, C2), 128.87 (CH, C1), 127.17 (CH, C6), 126.91 (C, C4), 126.41 (CH, C10), 124.39 (CH, C3), 53.04 ( $\text{CH}_3$ , C14) (Fig. S2). HRMS-ESI Calculated for  $\text{C}_{11}\text{H}_9\text{NO}_2\text{Na}$   $[\text{M}+\text{Na}]^+$ : 210.0526, found 210.052 (Fig. S4).

### 1.1.2 Synthesis of methyl 3-chloroisoquinoline-1-carboxylate (**3**)

mCPBA (5.2 g, 23.3 mmol, 2.0 equiv.) was added to a solution of methyl isoquinoline-1-carboxylate (2.2 g, 11.6 mmol, 1.0 equiv.) in CH<sub>2</sub>Cl<sub>2</sub> (35 mL). The solution was stirred for 18 h at rt. After substrate consumption, the mixture was filtered and washed with NaHCO<sub>3</sub> (sat.). The aqueous layer was extracted with CH<sub>2</sub>Cl<sub>2</sub> (3× 20 mL). The combined organic layers were washed with H<sub>2</sub>O, dried over Na<sub>2</sub>SO<sub>4</sub>, filtered, and concentrated in vacuo to give the 1-(methoxycarbonyl)isoquinoline 2-oxide as an orange oil (quant.) which was used without purification in the next step. *R<sub>f</sub>* = 0.25 (50% EtOAc/hexane). IR (cm<sup>-1</sup>)  $\nu$ : 3068, 2958, 1744, 1246 (Fig. S5). A solution of 1-(methoxycarbonyl)isoquinoline 2-oxide (2.8 g, 13.9 mmol) in POCl<sub>3</sub> (28 mL) was warmed to 105 °C. After 5 h the reaction was cooled at rt, and carefully neutralized with saturated sodium bicarbonate solution. Then, the mixture was extracted with CH<sub>2</sub>Cl<sub>2</sub> (3 x 30 mL) and the combined organic layers were washed with H<sub>2</sub>O, dried over Na<sub>2</sub>SO<sub>4</sub>, filtered, and concentrated in vacuo. Purification of the crude material via flash chromatography (SiO<sub>2</sub>, 20 to 50% EtOAc/hexanes with 5% CH<sub>2</sub>Cl<sub>2</sub>) to give chloroisoquinoline **3** as a light brown solid (2.47 g, 80%). *m.p.*: 96-99 °C. *R<sub>f</sub>* = 0.60 (50% EtOAc/hexane). IR (cm<sup>-1</sup>)  $\nu$ : 3077, 2955, 1718, 1241, 1150 (Fig. S7). <sup>1</sup>H NMR (700 MHz, CDCl<sub>3</sub>)  $\delta$  8.76 (d, *J* = 8.7 Hz, 1H, H3), 7.90 (s, 1H, H10), 7.82 (d, *J* = 8.3 Hz, 1H, H6), 7.76 (t, *J* = 7.3 Hz, 1H, H2), 7.68

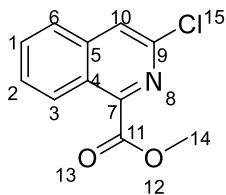

(t, *J* = 7.4 Hz, 1H, H1), 4.09 (s, 3H, H14) (Fig. S6). <sup>13</sup>C NMR (176 MHz, CDCl<sub>3</sub>)  $\delta$  165.38 (CO, C11), 148.78 (C, C9), 144.25 (C, C7), 139.29 (C, C5), 131.74 (CH, C), 129.17 (CH, C1), 126.77 (CH, C6), 126.50 (CH, C3), 125.76 (C, C4), 123.85 (CH, C10), 53.41 (CH<sub>3</sub>, C14) (Fig. S6). HRMS-ESI Calculated for C<sub>11</sub>H<sub>8</sub>NO<sub>2</sub>ClNa [M+Na]<sup>+</sup>: 244.0136, found 244.0132 (Fig. S8).

### 1.1.3 Synthesis of methyl 3-(diphenylphosphoryl)isoquinoline-1-carboxylate (**4**)

Optimized procedure:<sup>1</sup> A solution of chloroisoquinoline **3** (0.9 g, 4.0 mmol, 1.0 equiv.), diphenylphosphine oxide (1.6 g, 7.9 mmol, 2.0 equiv.), K<sub>3</sub>PO<sub>4</sub> (1.7 g, 7.9 mmol, 2.0 equiv.) and Ni(dppp)Cl<sub>2</sub> (0.2 g, 0.4 mmol, 10 mol%) in dry xylene (66 mL) under argon atmosphere was warmed to 150 °C. The mixture was stirred for 5 h and after completion of the reaction (the progress of the

<sup>1</sup> See optimization in Table S1 (section 2)

process was monitored by TLC) allowed to cool down to rt and filtered through a pad of Celita® eluting with AcOEt/CH<sub>2</sub>Cl<sub>2</sub> (1:1). The filtrate was concentrated in vacuo and purified by flash chromatography (SiO<sub>2</sub>, 20% AcOEt/CH<sub>2</sub>Cl<sub>2</sub> to 100% CH<sub>2</sub>Cl<sub>2</sub>) to afford 1.29 g of methyl 3-(diphenylphosphoryl)isoquinoline-1-carboxylate (**4**) as a yellow oil (84% yield). *R<sub>f</sub>* = 0.42 (1:2 AcOEt/CH<sub>2</sub>Cl<sub>2</sub>). IR (cm<sup>-1</sup>)  $\nu$ : 3053, 2953, 1724, 1437, 1236, 1190, 1120 (Fig. S12). <sup>1</sup>H NMR (500 MHz, CDCl<sub>3</sub>)  $\delta$  8.89 (d, *J* = 6.9 Hz, 1H, H3), 8.66 (d, *J* = 7.9 Hz, 1H, H10), 8.02 (m, 5H, H6 + 4xH17), 7.79 (m, 2H, 2xH19), 7.46 (m, 6H, H1 + H2 + 4xH18), 4.06 (s, 3H, H14) (Fig. S9). <sup>31</sup>P NMR (202 MHz, CDCl<sub>3</sub>)  $\delta$  19.15 (s) (Fig. S9). <sup>13</sup>C NMR (126 MHz, CDCl<sub>3</sub>)  $\delta$  166.34 (CO, C11), 149.52 (C, *d*, *J* = 18.1 Hz, C7), 147.35 (C, *d*, *J* = 133.8 Hz, C9), 136.16 (C, *d*, *J* = 10.0 Hz, C5), 132.47 (C, *d*, *J* = 104.9 Hz, C16), 132.29 (CH, *d*,

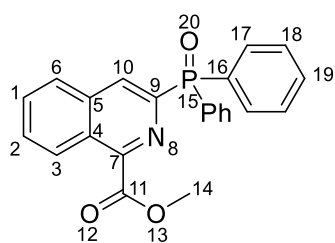

*J* = 9.5 Hz, C10), 131.99 (CH, *d*, *J* = 2.8 Hz, 2xC19), 131.52 (CH, C2), 130.71 (CH, C1), 130.14 (CH, *d*, *J* = 18.5 Hz, 4xC17), 128.45 (CH, *d*, *J* = 12.2 Hz, 4xC18), 128.33 (CH, C3), 126.72 (C, *d*, *J* = 2.6 Hz, C4), 126.43 (CH, C6), 53.07 (CH<sub>3</sub>, C14) (Fig. S10). HRMS-ESI Calculated for C<sub>23</sub>H<sub>18</sub>NO<sub>3</sub>PNa [M+Na]<sup>+</sup>: 410.0917, found 410.0906 (Fig. S13).

#### 1.1.4 Synthesis of 3-(diphenylphosphoryl)isoquinoline-1-carboxylic acid (H<sup>3</sup>DPIQC)

A solution of methyl 3-(diphenylphosphoryl)isoquinoline-1-carboxylate (0.3 g, 0.8 mmol, 1.0 equiv.) and NaOH (60 mg, 1.6 mmol, 2.0 equiv.) in MeOH (2.0 mL)/water (1.0 mL) was stirred for 3 h at 65 °C. When the reaction was complete, the MeOH was concentrated in vacuo, redissolved in CHCl<sub>3</sub>/H<sub>2</sub>O (10 mL, 1:1) and the aqueous layer was separated and acidified with HCl 2 M to pH 2-3. Then, extracted with CHCl<sub>3</sub> (3 x 10 mL), dried over Na<sub>2</sub>SO<sub>4</sub>, filtered, and concentrated in vacuo to give the H<sup>3</sup>DPIQC ligand as a white solid (0.26 g, 92%). *m.p.*: 200-202 °C. *R<sub>f</sub>* = 0.03 (1:2 AcOEt/CH<sub>2</sub>Cl<sub>2</sub>). IR (cm<sup>-1</sup>)  $\nu$ : 3048–2225, 1698, 1558, 1439, 1177 (Fig. S16). <sup>1</sup>H NMR (700 MHz, CDCl<sub>3</sub><sup>2</sup>)  $\delta$  9.53 (m, 1H, H3), 8.89 (d, *J* = 6.8 Hz, 1H, H10), 8.05 (dd, *J* = 6.3, 3.3 Hz, 1H, H6), 7.90 (dd, *J* = 6.4, 3.3 Hz, 2H, 2xH19), 7.80 (dd, *J* = 12.0, 7.9 Hz, 4H, 4xH17), 7.59 (t, *J* = 7.7 Hz, 2H, H1 + H2), 7.50 (td, *J* = 7.7, 2.9

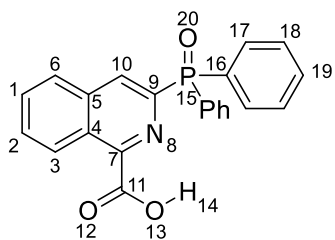

Hz, 4H, 4xH18). <sup>13</sup>C NMR (176 MHz, CDCl<sub>3</sub>)  $\delta$  163.76 (CO, C11), 145.36 (C, *d*, *J* = 129.8 Hz, C9), 144.87 (C, *d*, *J* = 15.5 Hz, C7), 137.17 (C, *d*, *J* = 9.3 Hz, C5), 132.93 (CH, *d*, *J* = 18.3 Hz, 4xC17), 132.74 (CH, *d*, *J* = 2.6 Hz, 2xC19), 132.58 (CH, C2), 132.19 (CH, *d*, *J* = 10.1 Hz, C10), 132.16 (CH,

<sup>2</sup> The H14 signal was not observed in CDCl<sub>3</sub>

C1), 131.07 (C, d,  $J = 107.4$  Hz, C16), 128.93 (CH, d,  $J = 12.2$  Hz, 4xC18), 128.47 (CH, C3), 127.73 (CH, C6), 127.40 (C, d,  $J = 2.0$  Hz, C4).  $^{31}\text{P}$  NMR (162 MHz,  $\text{CDCl}_3$ )  $\delta$  23.76 (s) (Fig. S14 y S15). **HRMS-ESI** Calculated for  $\text{C}_{22}\text{H}_{16}\text{NO}_3\text{PNa}$   $[\text{M}+\text{Na}]^+$ : 396.0760, found 396.0756 (Fig. S17).

#### 1.1.5 Synthesis of the europium (III) complex

A solution of  $\text{Eu}(\text{NO}_3)_3 \cdot 5\text{H}_2\text{O}$  (38.2 mg, 0.09 mmol, 1.0 equiv.) in MeOH (1.0 mL) was added to a solution of **H<sup>3</sup>DPIQC** (0.1 g, 0.3 mmol, 3.0 equiv.) and NaOH (10.7 mg, 0.3 mmol, 3.0 equiv.) in MeOH (1.0 mL) at rt, and a white solid product precipitated immediately. The mixture was filtered and washed with MeOH to afford the HL ligand as a white solid (0.1 g, 88%). **m.p.**: >300 °C. **R<sub>f</sub>** = 0.03 (1:2 AcOEt/ $\text{CH}_2\text{Cl}_2$ ). **IR** ( $\text{cm}^{-1}$ )  $\nu$ : 3056, 1627, 1549, 1358, 1297, 1150, 747 (Fig. S18). **Raman** ( $\text{cm}^{-1}$ )  $\nu$ : 3062, 1585, 1352, 999, 409 (Fig. S18). **HRMS-ESI** Calculated for  $\text{C}_{66}\text{H}_{45}\text{N}_3\text{O}_9\text{EuP}_3\text{Na}$   $[\text{M}+\text{Na}]^+$ : 1290.1459, found 1290.1423 (Fig. S19).

## 2. Optimization of C-P cross coupling. Synthesis of isoquinoline 4.

**Table S1.** Isoquinoline **4** synthesis optimization.<sup>a</sup>

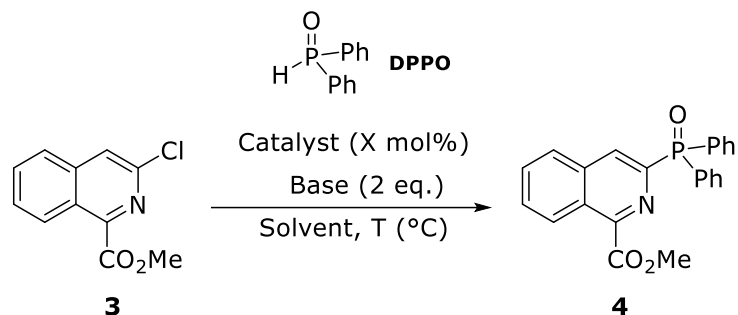

| Entry    | Catalyst (mol%)                         | DPPO (eq.)  | Solvent       | Base                               | Temp (°C)  | Atmosphere     | Comp 4 (%) <sup>b</sup> | Reference                        |
|----------|-----------------------------------------|-------------|---------------|------------------------------------|------------|----------------|-------------------------|----------------------------------|
| 1        | Ni(dppp)Cl <sub>2</sub> (10)            | 2.00        | Toluene       | K <sub>2</sub> CO <sub>3</sub>     | 110        | N <sub>2</sub> | ND                      | Original conditions <sup>3</sup> |
| 2        | Pd(OAc) <sub>2</sub> / dppf (5)         | 1.20        | DMF           | K <sub>2</sub> CO <sub>3</sub>     | 110        | N <sub>2</sub> | 23                      | <sup>4</sup>                     |
| 3        | Ni(dppp)Cl <sub>2</sub> (5)             | 1.50        | Dioxane       | K <sub>2</sub> CO <sub>3</sub>     | 100        | N <sub>2</sub> | 4                       | <sup>5</sup>                     |
| 4        | Ni(dppp)Cl <sub>2</sub> (5)             | 1.05        | DMF           | K <sub>2</sub> CO <sub>3</sub>     | 50 to 100  | N <sub>2</sub> | ND                      |                                  |
| 5        | Ni(dppp)Cl <sub>2</sub> (5) / Zn (1 eq) | 1.05        | DMF           | K <sub>2</sub> CO <sub>3</sub>     | 100        | N <sub>2</sub> | ND                      |                                  |
| 6        | Ni(dppp)Cl <sub>2</sub> (10)            | 2.00        | Toluene       | K <sub>2</sub> CO <sub>3</sub>     | 110        | Ar             | 53                      |                                  |
| 7        | Ni(dppp)Cl <sub>2</sub> (10)            | 2.00        | Xylene        | K <sub>2</sub> CO <sub>3</sub>     | 150        | Ar             | 74                      |                                  |
| <b>8</b> | <b>Ni(dppp)Cl<sub>2</sub> (10)</b>      | <b>2.00</b> | <b>Xylene</b> | <b>K<sub>3</sub>PO<sub>4</sub></b> | <b>150</b> | <b>Ar</b>      | <b>84</b>               | <b>This work</b>                 |

<sup>a</sup> Conditions: isoquinoline **3** (1.0 eq.) and DPPO (X eq.), were treated with catalyst (X mol%) and Base (2.0 eq.) in the indicated solvent at the indicated temperature (°C), under the indicated inert atmosphere for 12 h. <sup>b</sup> Isolated yield. <sup>c</sup> Diphenylphosphine was detected. ND = Not detecte

<sup>3</sup> Cai, Z., Wei, C., Sun, B., Wei, H., Liu, Z., Bian, Z., Huang, C., 2021. Luminescent europium(iii) complexes based on tridentate isoquinoline ligands with extremely high quantum yield. *Inorg. Chem. Front.* 8, 41–47. <https://doi.org/10.1039/d0qi00894j>

<sup>4</sup> Zakirova, G.G., Mladentsev, D.Y., Borisova, N.E., 2019. Palladium-Catalyzed C-P Cross-Coupling between (Het)aryl Halides and Secondary Phosphine Oxides. *Synth.* 51, 2379–2386. <https://doi.org/10.1055/s-0037-1610698>

<sup>5</sup> Zhao, Y.L., Wu, G.J., Li, Y., Gao, L.X., Han, F.S., 2012. [NiCl<sub>2</sub>(dppp)]-catalyzed cross-coupling of aryl halides with dialkyl phosphite, diphenylphosphine oxide, and diphenylphosphine. *Chem. - A Eur. J.* 18, 9622–9627. <https://doi.org/10.1002/chem.201103723>

### 3. Powder Diffraction Patterns

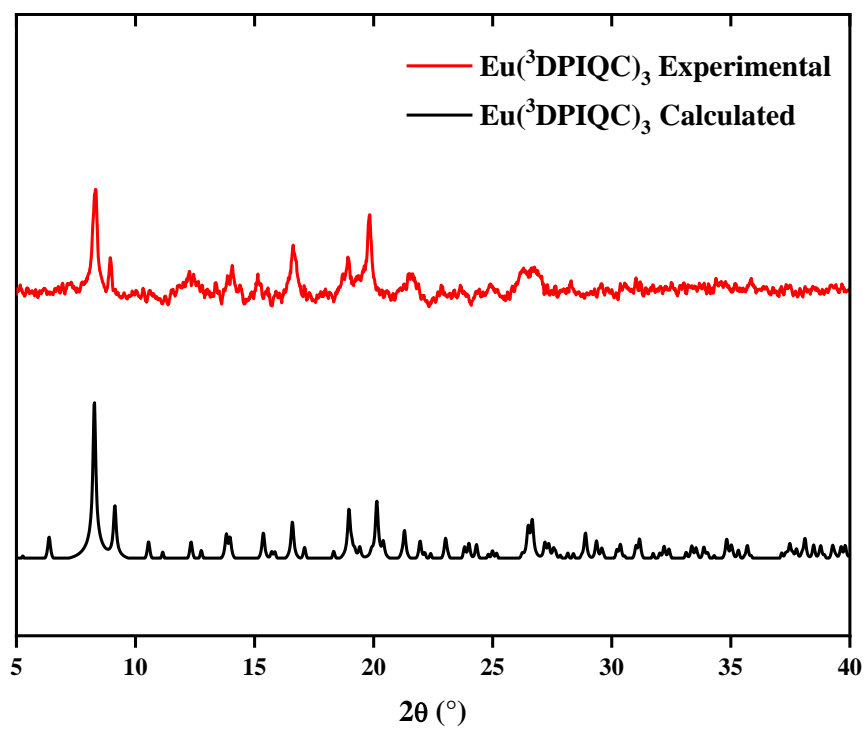

**Figure S1.** Calculated from the crystallographic data reported by Cai et al.<sup>3</sup>

## 4. NMR, IR, Raman and MS Spectra

### Methyl isoquinoline-1-carboxylate (2)

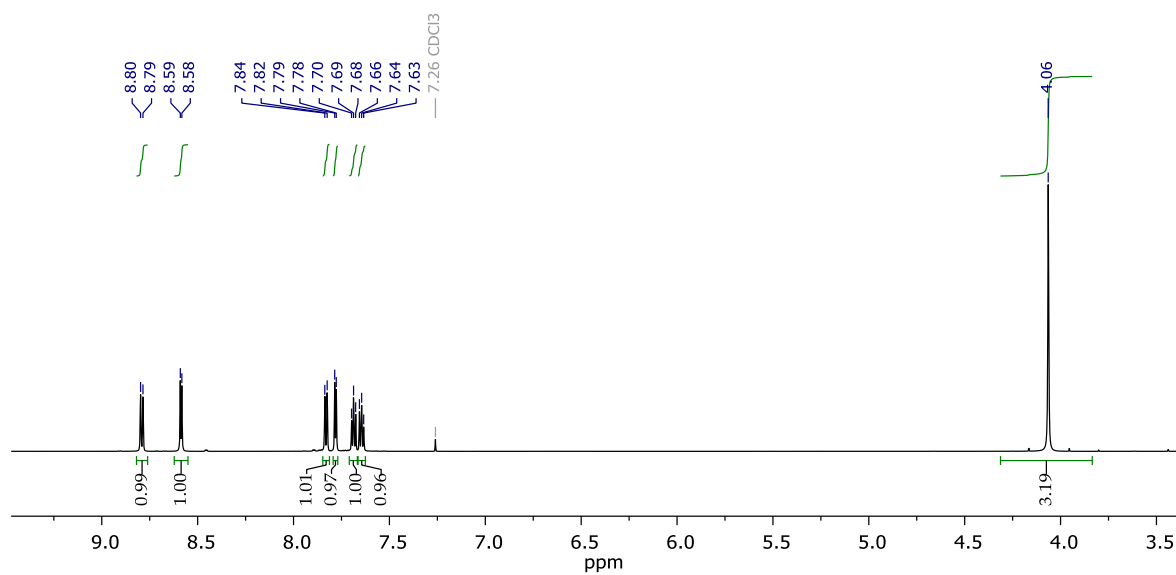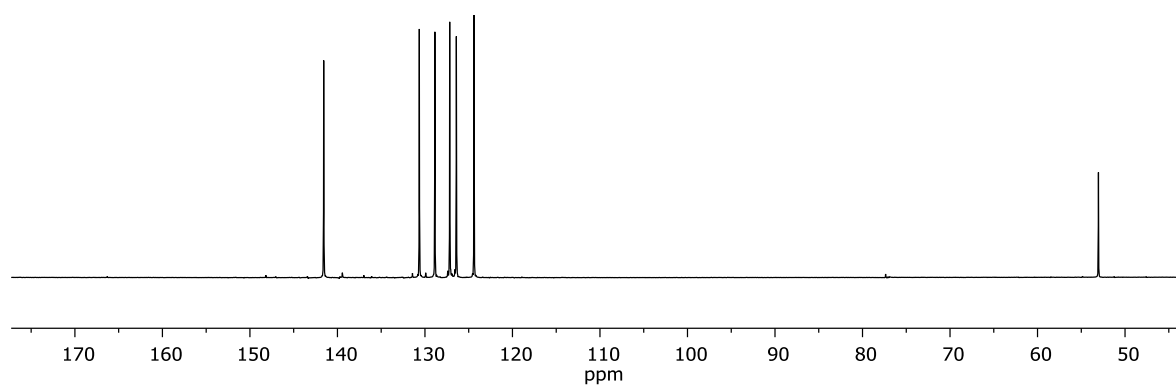



**Figure S2** .<sup>1</sup>H, DEPT-135 and <sup>13</sup>C RMN of methyl isoquinoline-1-carboxylate.

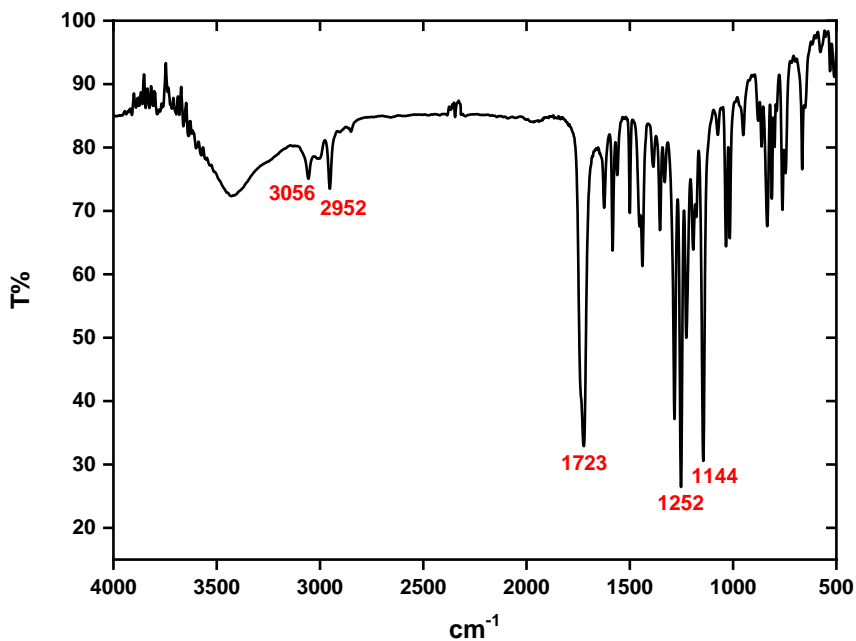

**Figure S3**. FT-IR spectrum of methyl isoquinoline-1-carboxylate.

Sample Name: **FVP-026**

Analysis Name: I20230523-11

ThermoFisher Orbitrap: Exactone Plus with Extend Mass Range: Source HESI II

Ion Polarity: Positive

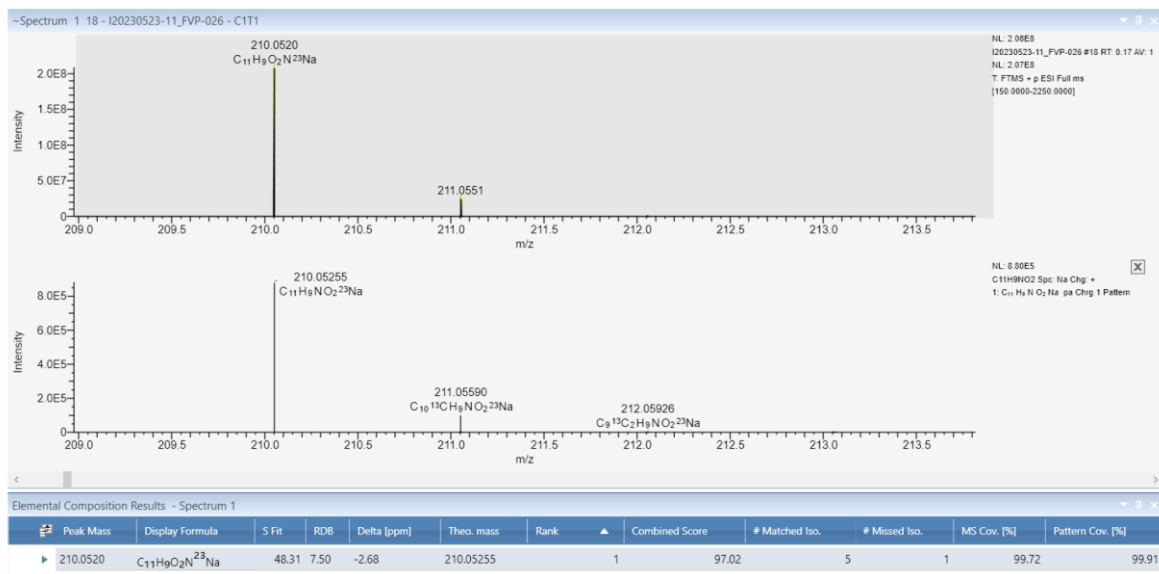

**Figure S4** .Found and calculated HRMS-ESI of methyl isoquinoline-1-carboxylate.

**1-(methoxycarbonyl)isoquinoline 2-oxide**

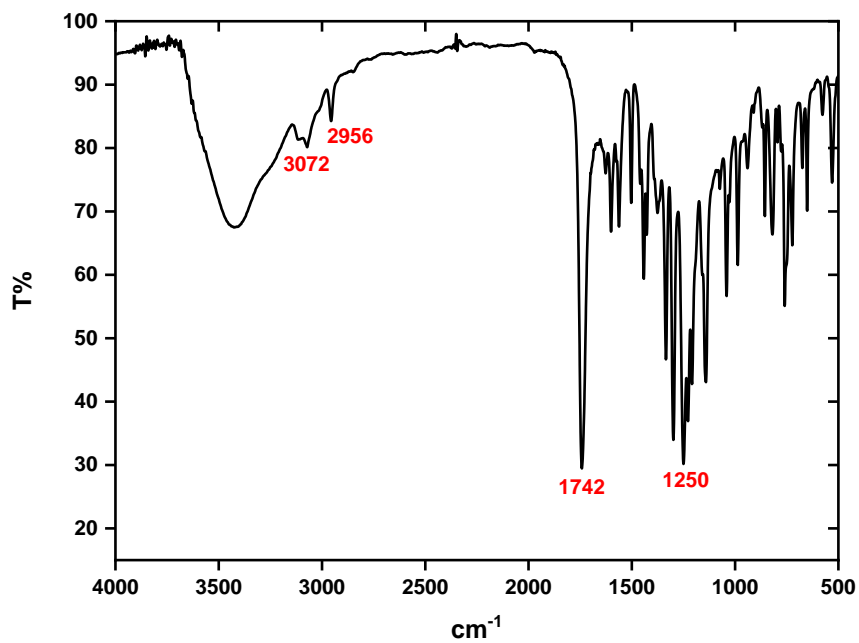

**Figure S5** FT-IR spectrum of 1-(methoxycarbonyl)isoquinoline 2-oxide.

**Methyl 3-chloroisoquinoline-1-carboxylate (3)**

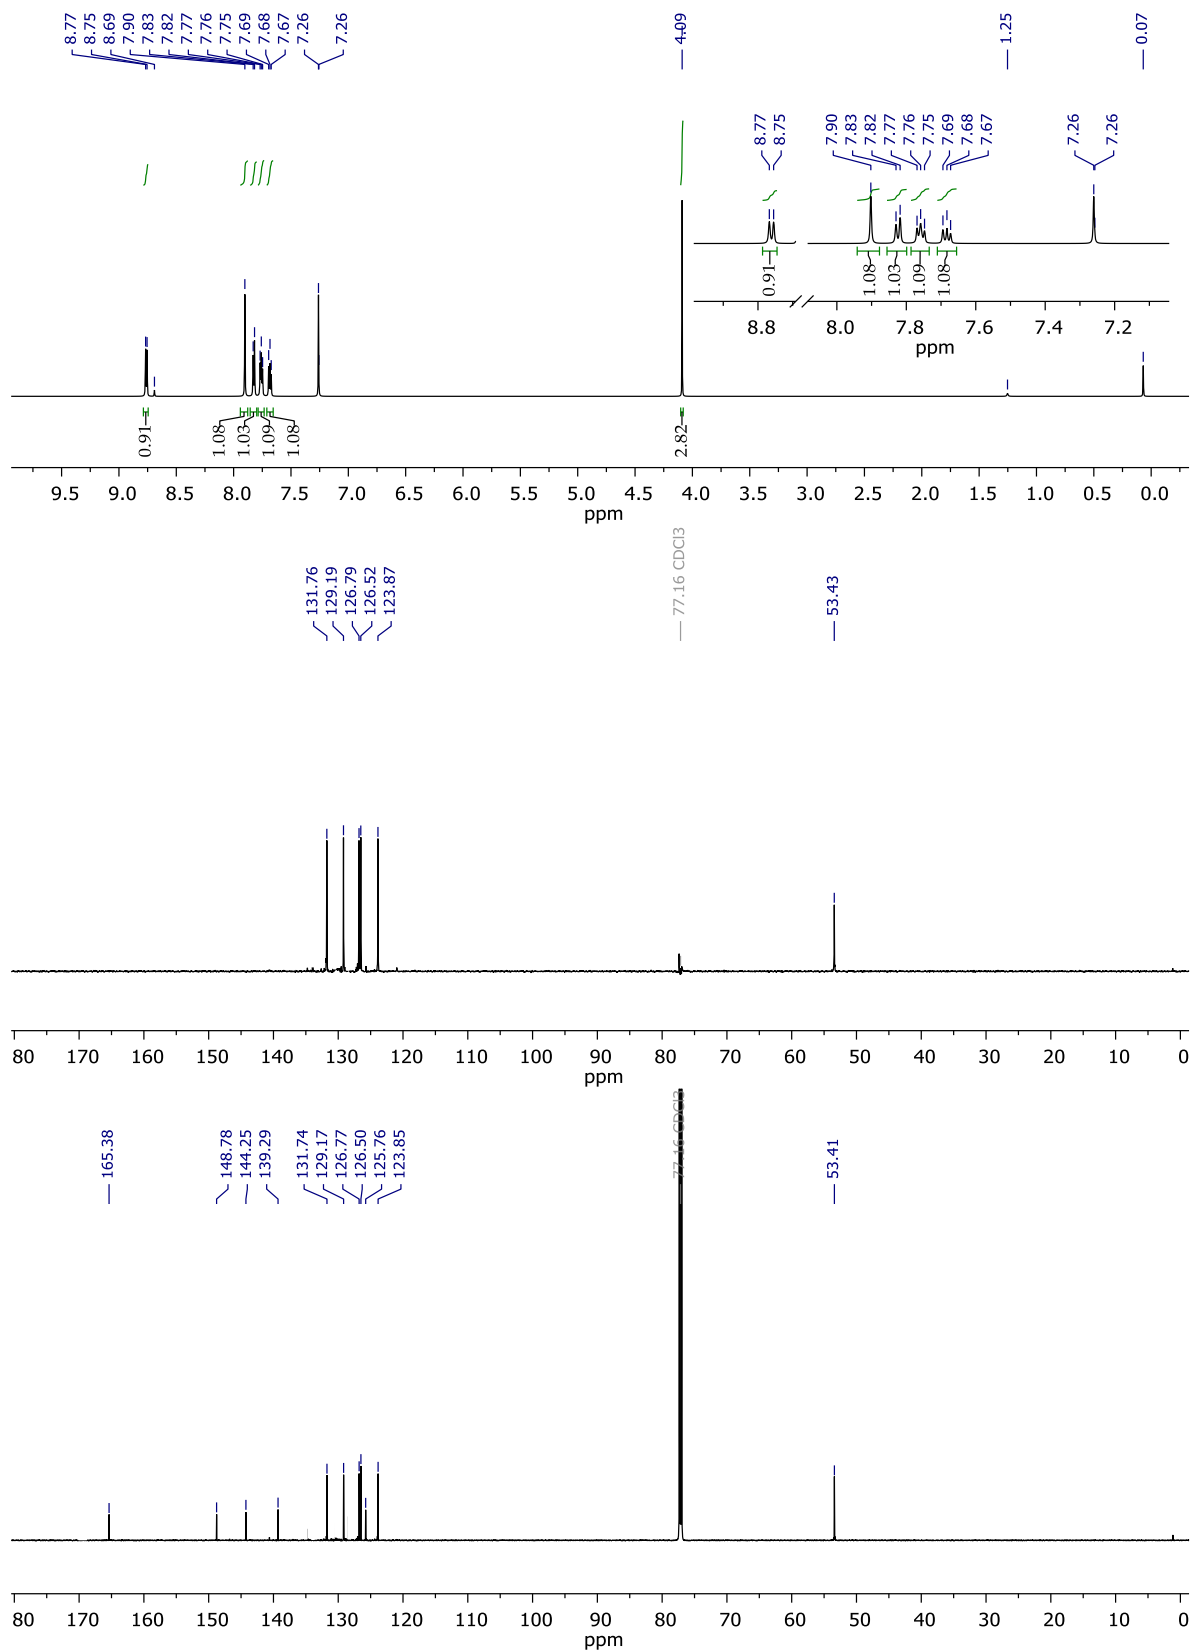

**Figure S6** <sup>1</sup>H, DEPT-135 and <sup>13</sup>C RMN of methyl 3-chloroisoquinoline-1-carboxylate.

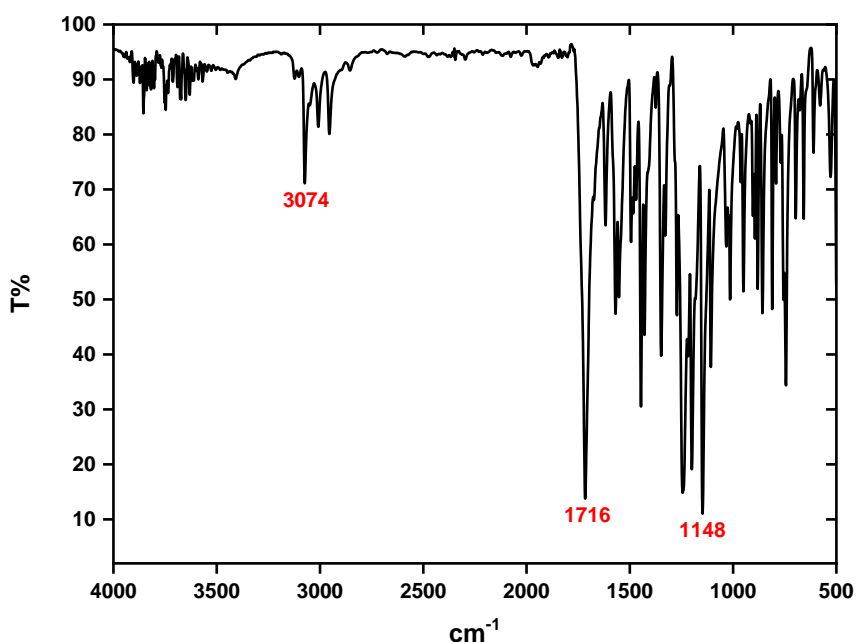

**Figure S7** FT-IR spectrum of methyl 3-chloroisoquinoline-1-carboxylate.

Sample Name: FVP-006

Analysis Name: I20230523-13

ThermoFisher Orbitrap: Exactive Plus with Extend Mass Range: Source HESI II

Ion Polarity: Positive

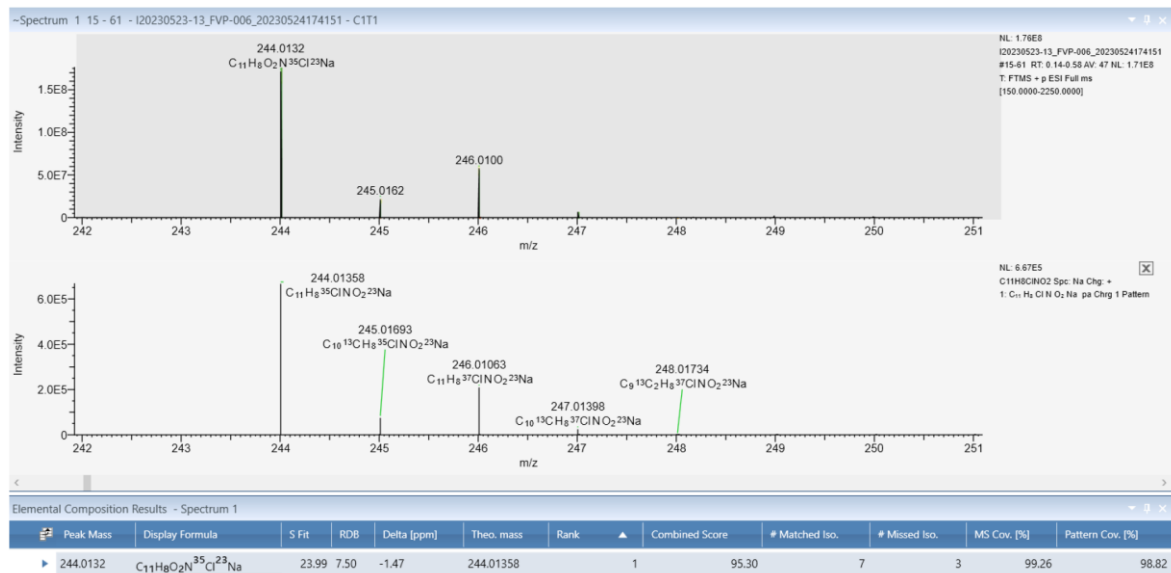

**Figure S8** Found and calculated HRMS-ESI of methyl 3-chloroisoquinoline-1-carboxylate.

**Methyl 3-(diphenylphosphoryl)isoquinoline-1-carboxylate (4)**

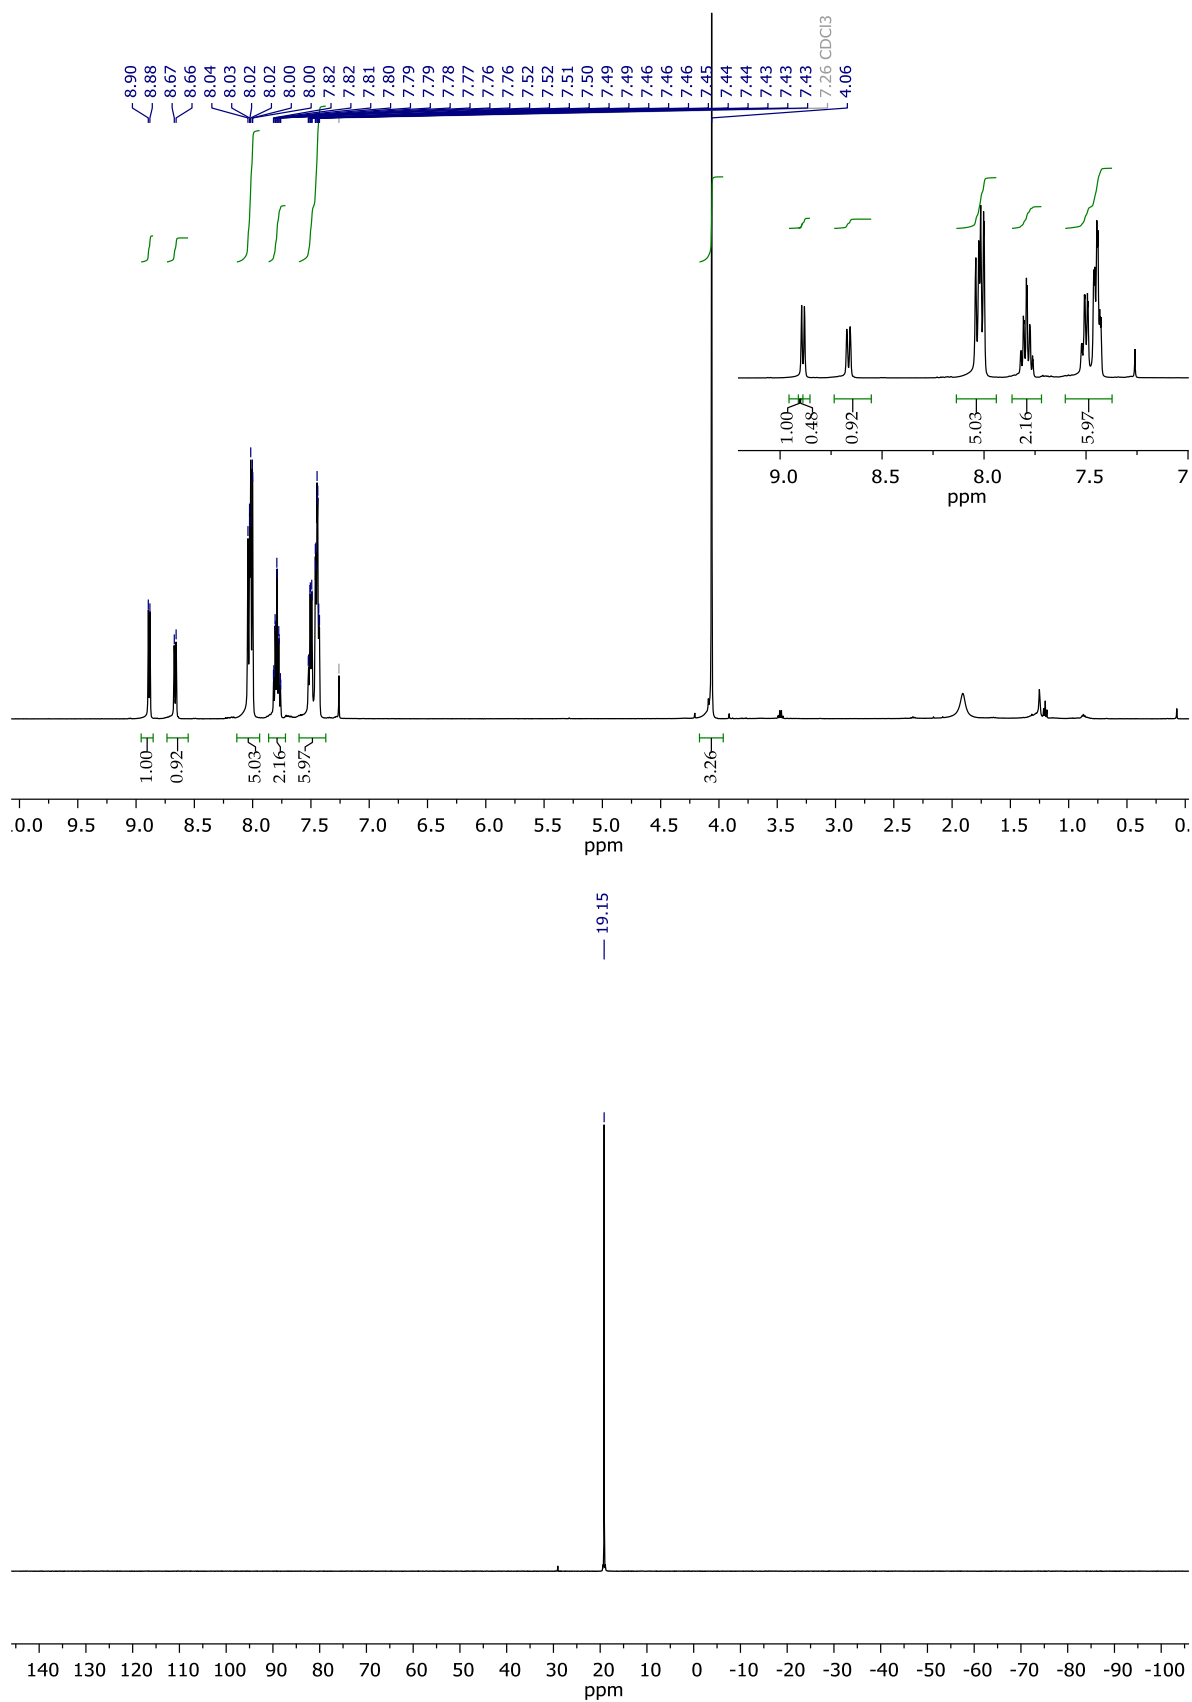

**Figure S9**  $^1\text{H}$  and  $^{31}\text{P}$  RMN of methyl 3-(diphenylphosphoryl)isoquinoline-1-carboxylate.

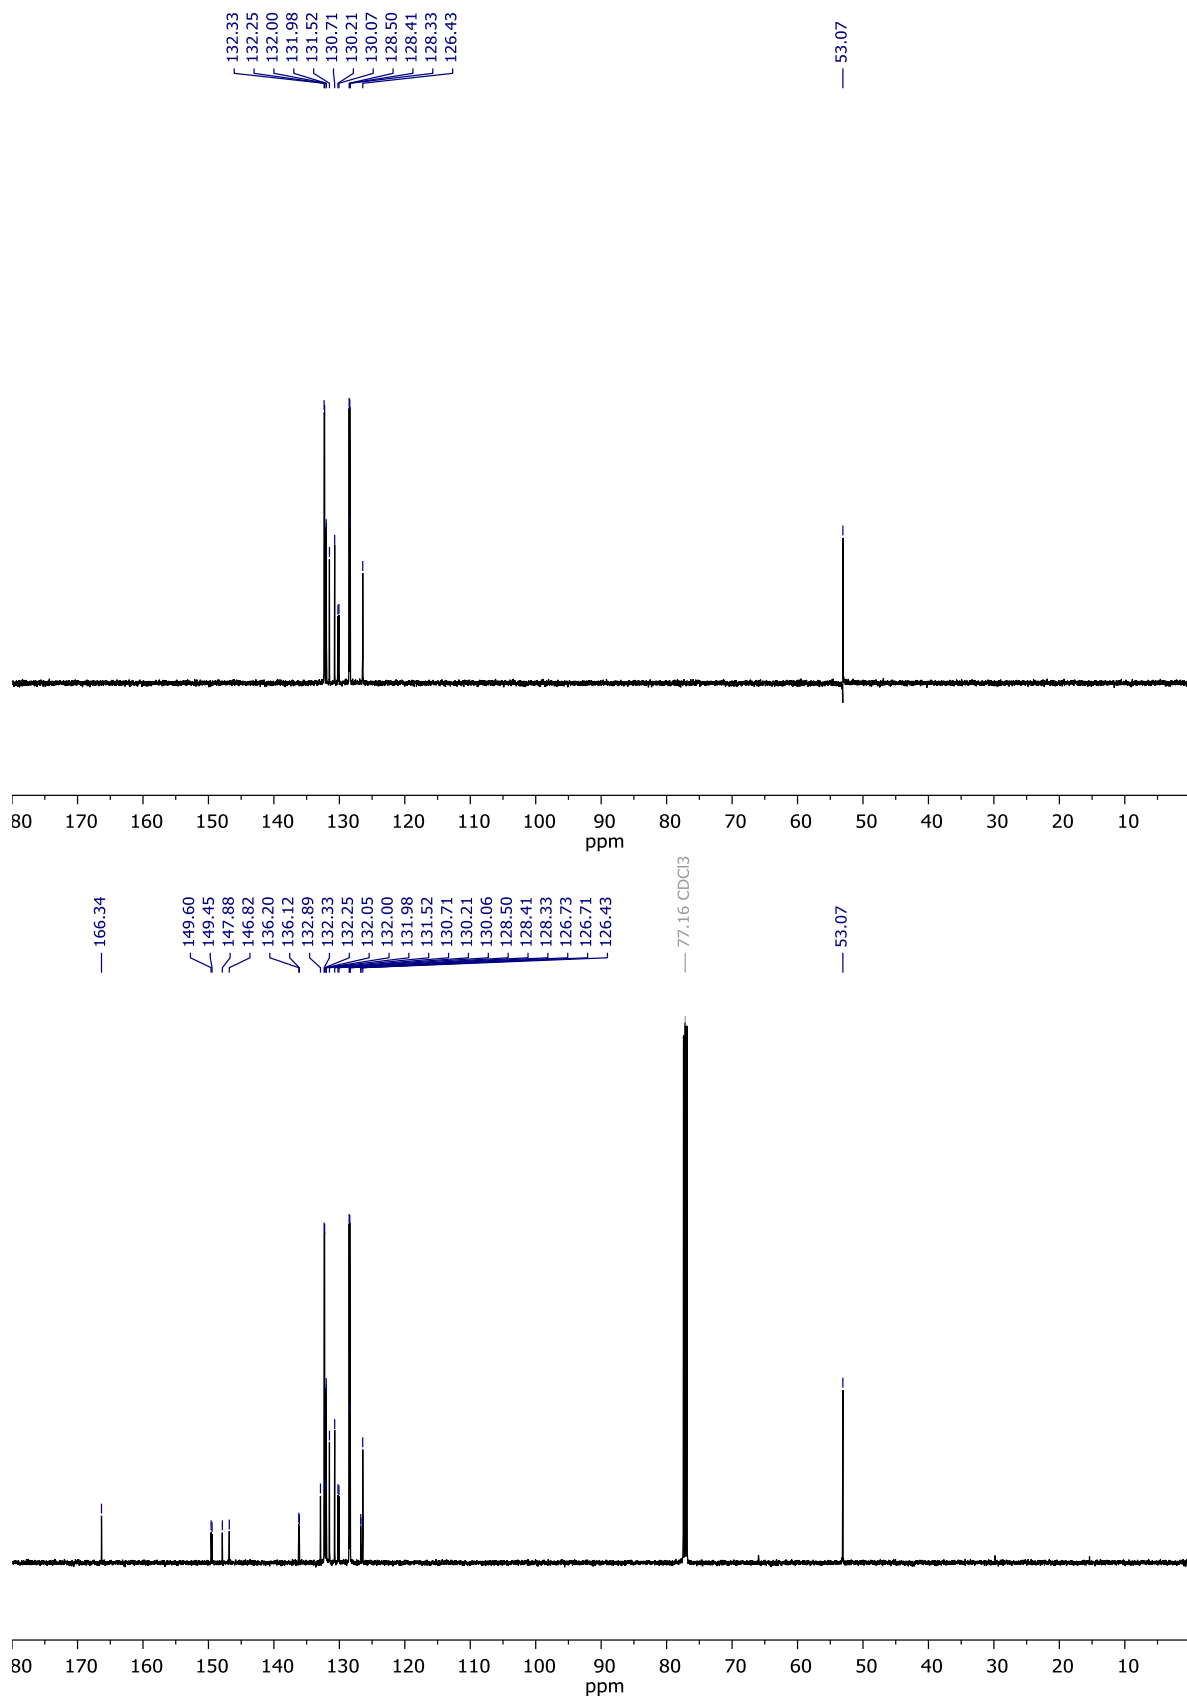

**Figure S10** DEPT-135 and  $^{13}\text{C}$  RMN of methyl 3-(diphenylphosphoryl)isoquinoline-1-carboxylate.

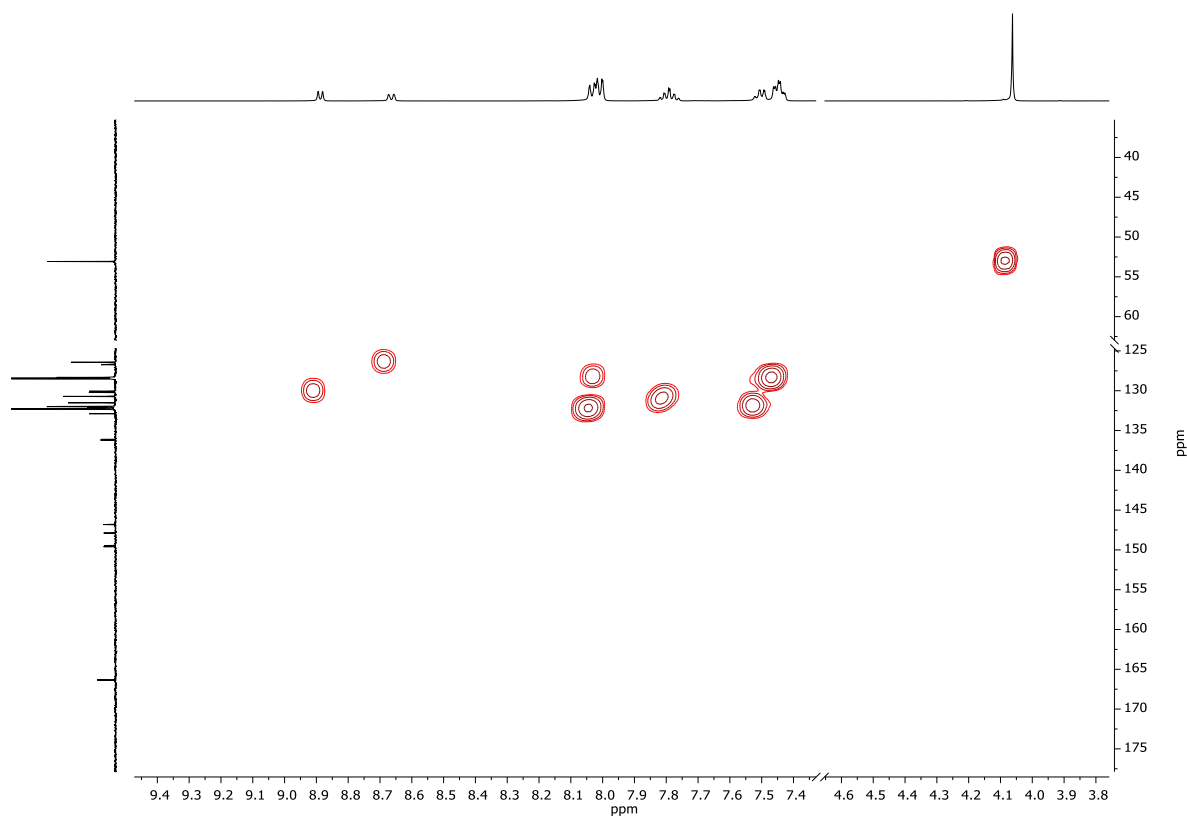

**Figure S11** HSQC of methyl 3-(diphenylphosphoryl)isoquinoline-1-carboxylate.

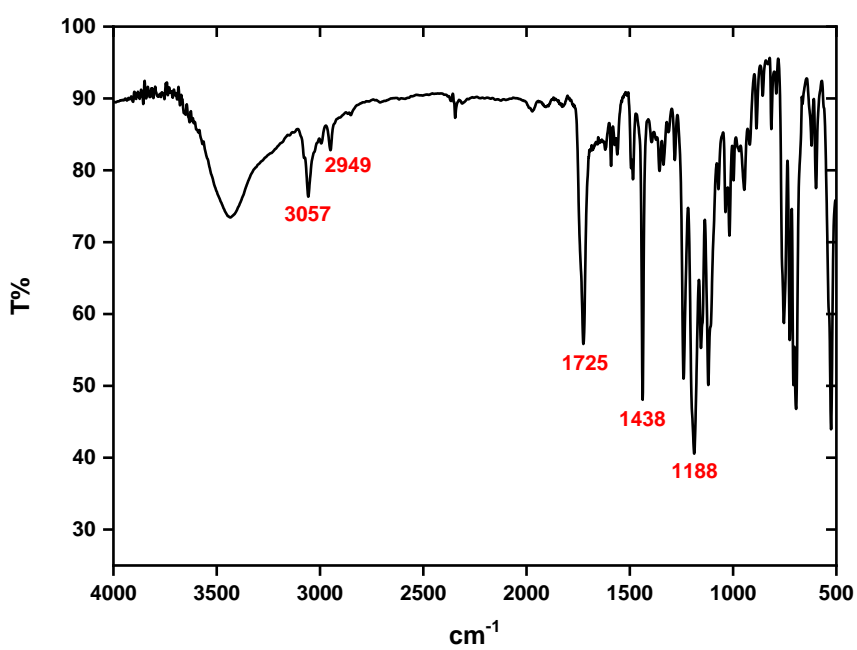

**Figure S12** FT-IR spectrum of methyl 3-(diphenylphosphoryl)isoquinoline-1-carboxylate.

Sample Name: **FVP-024-F3**

Analysis Name: I20230523-12

ThermoFisher Orbitrap: Exactive Plus with Extend Mass Range: Source HESI II

Ion Polarity: Positive

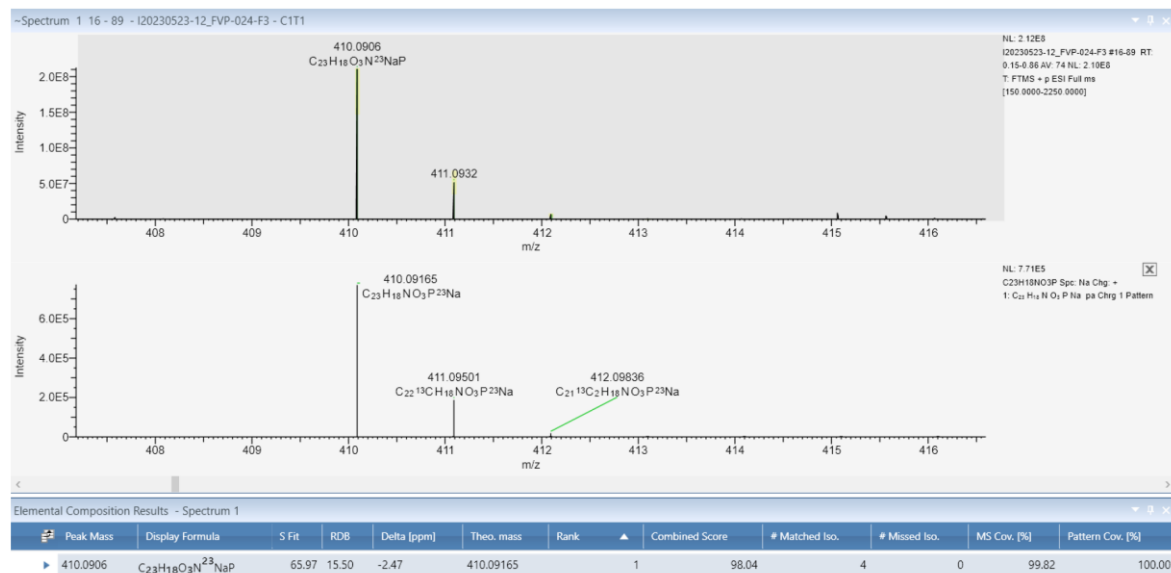

**Figure S13** Found and calculated HRMS-ESI of methyl 3-(diphenylphosphoryl)isoquinoline-1-carboxylate.



The figure displays two NMR spectra for compound 1. The top spectrum is the  $^1\text{H}$  NMR spectrum, recorded in  $\text{CDCl}_3$  at 400 MHz. The x-axis represents the chemical shift in ppm, ranging from 0.0 to 10.0. The spectrum shows several multiplets in the aromatic region (6.5–9.6 ppm) and two multiplets in the aliphatic region (7.4–7.6 ppm). Integration values are provided below the peaks. The bottom spectrum is the  $^{13}\text{C}$  NMR spectrum, recorded in  $\text{CDCl}_3$  at 100 MHz. The x-axis represents the chemical shift in ppm, ranging from 0 to 30. A single sharp peak is observed at 23.76 ppm, corresponding to the solvent  $\text{CDCl}_3$ .

**$^1\text{H}$  NMR Data (ppm):**

| Chemical Shift (ppm)                     | Integration |
|------------------------------------------|-------------|
| 9.54, 9.53, 9.52                         | 1.00        |
| 8.90, 8.89, 8.70                         | 0.98        |
| 8.06, 8.05, 8.05, 7.91, 7.90             | 1.06        |
| 7.89, 7.81, 7.80, 7.79, 7.78             | 2.08        |
| 7.60, 7.59, 7.58, 7.51, 7.50, 7.49       | 4.05        |
| 7.26, 7.26, 7.26                         | 2.01        |
| 7.19, 7.19, 7.19                         | 4.08        |
| 7.54, 7.53, 7.52                         | 1.00        |
| 8.90, 8.89                               | 0.98        |
| 8.06, 8.06, 8.05                         | 1.06        |
| 7.91, 7.90, 7.89, 7.81, 7.80, 7.79, 7.78 | 2.08        |
| 7.60, 7.59, 7.58, 7.51, 7.50, 7.49       | 4.05        |
| 7.26, 7.26, 7.26                         | 2.01        |
| 7.19, 7.19, 7.19                         | 4.08        |

**$^{13}\text{C}$  NMR Data (ppm):**

| Chemical Shift (ppm) |
|----------------------|
| 23.76                |

**Figure S14**  $^1\text{H}$  and  $^{31}\text{P}$  RMN of 3-(diphenylphosphoryl)isoquinoline-1-carboxylic acid.

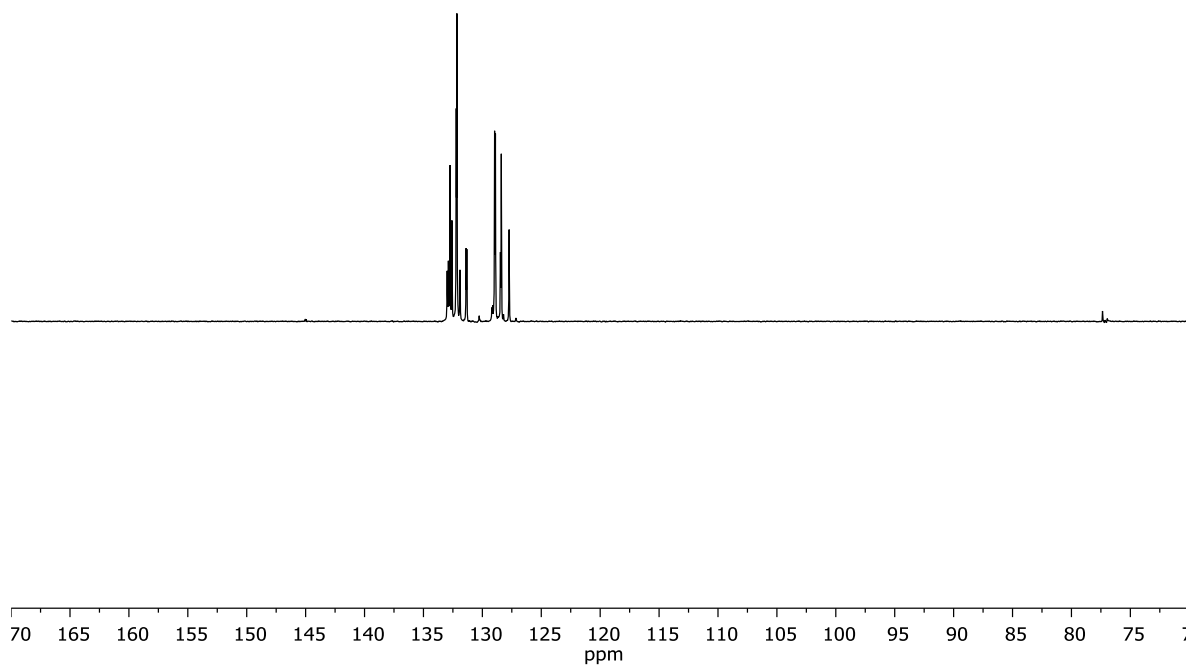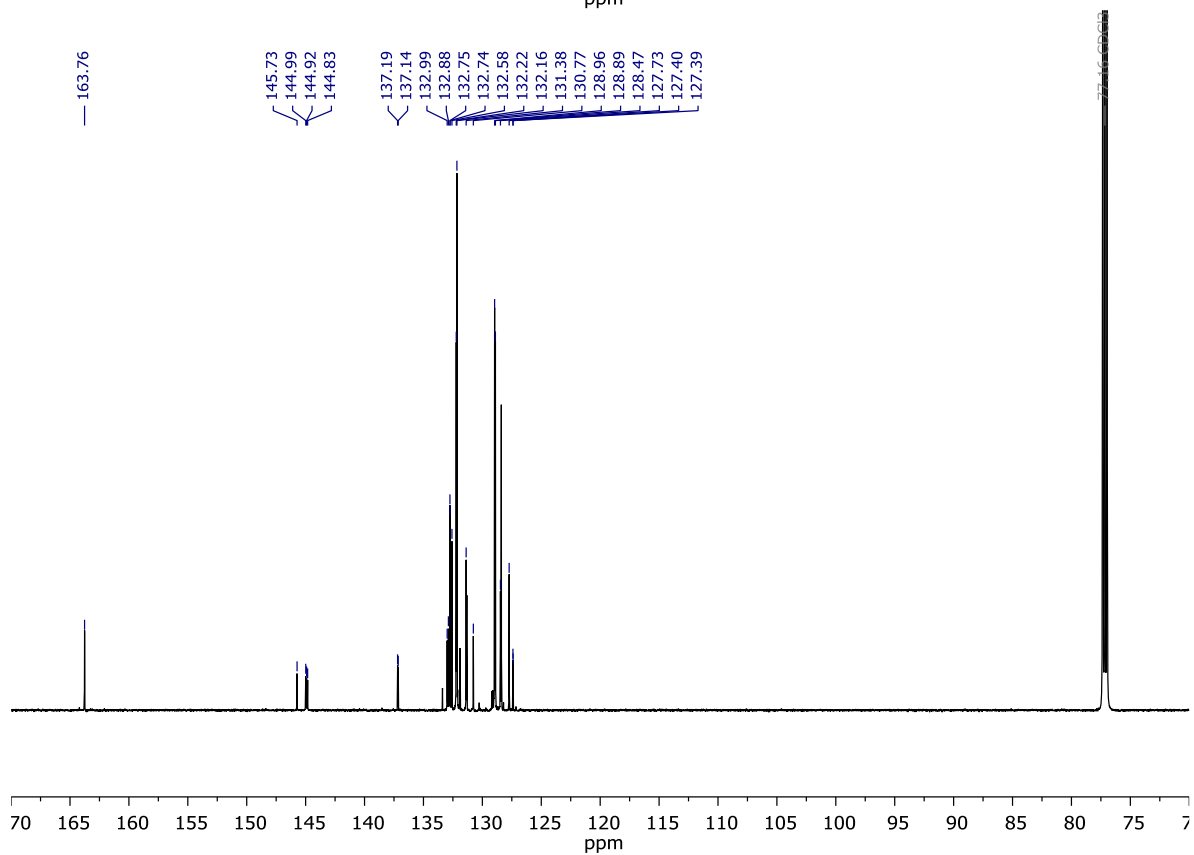

**Figure S15** DEPT-135 and  $^{13}\text{C}$  RMN of 3-(diphenylphosphoryl)isoquinoline-1-carboxylic acid.

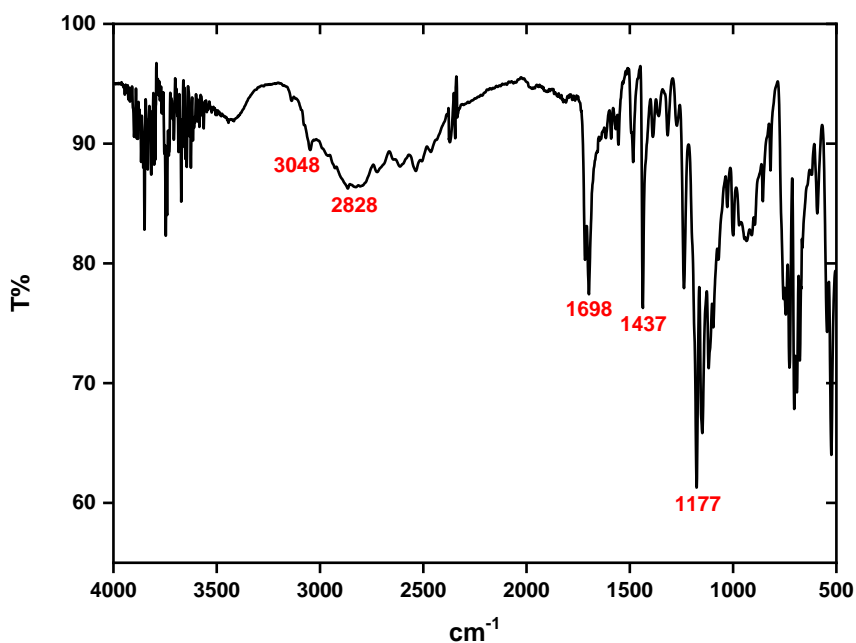

**Figure S16** FT-IR spectrum of 3-(diphenylphosphoryl)isoquinoline-1-carboxylic acid.

Sample Name: FVP-020-F2

Analysis Name: I20230523-14

ThermoFisher Orbitrap: Exactive Plus with Extend Mass Range: Source HESI II

Ion Polarity: Positive

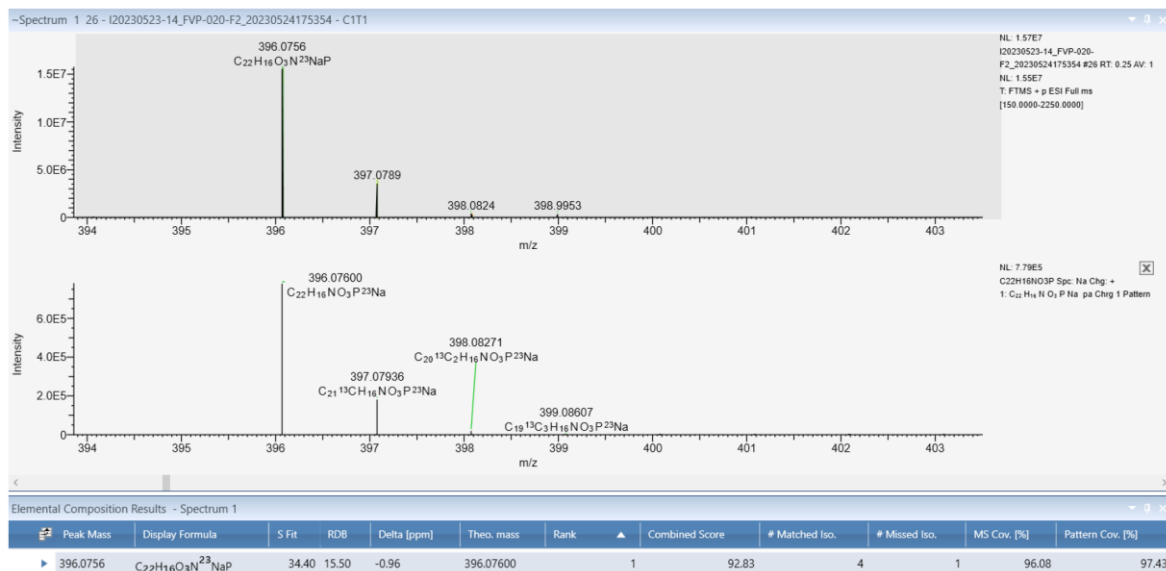

**Figure S17** Found and calculated HRMS-ESI of 3-(diphenylphosphoryl)isoquinoline-1-carboxylic acid.

$\text{Eu}(\text{}^3\text{DPIQC})_3$

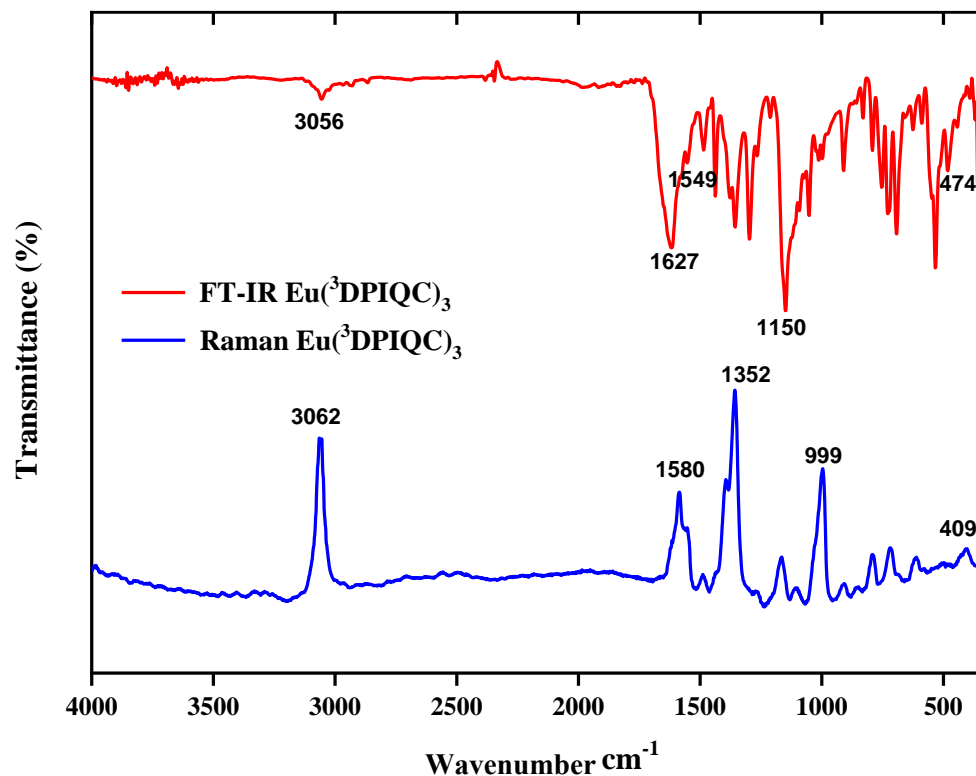

**Figure 18** FT-IR and Raman spectrum of  $\text{Eu}(\text{}^3\text{DPIQC})_3$ .

Sample Name: **Eu-052**

Analysis Name: I20230523-15

ThermoFisher Orbitrap: Exactive Plus with Extend Mass Range: Source HESI II

Ion Polarity: Positive

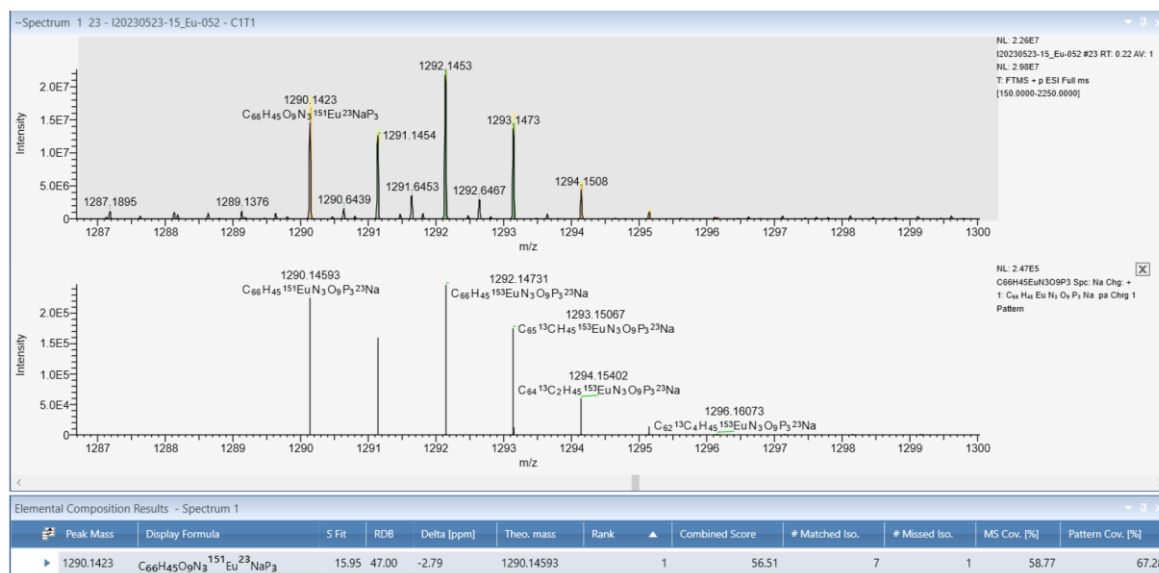

**Figure S19** Found and calculated HRMS-ESI of  $\text{Eu}(\text{}^3\text{DPIQC})_3$ .
